# Supplementary material for: Assessing Hospital Resource Utilization with Application to Imaging for Patients Diagnosed with Prostate Cancer
Source: MDPI journal article supplement (doi:10.3390/healthcare10020248), 2022-01-28
Supplement: s1 [file s1]

## SUPPLEMENTARY MATERIALS

| Content                                                                                                                                                                                                                                                                                           | Page(s) |
|---------------------------------------------------------------------------------------------------------------------------------------------------------------------------------------------------------------------------------------------------------------------------------------------------|---------|
| Table S1. Definitions of competing resource variables.                                                                                                                                                                                                                                            | 2-12    |
| Table S2. Multivariate logistic regression analysis results with coefficients (Coef), standard errors (SE), and p-values (p) for the three models: (a) patient characteristics and competing resource utilization; (b) patient characteristics only; and (c) competing resource utilization only. | 13-16   |
| Table S3. Binary representation of competing resources indicating the usage of different combinations of resources (0=not used; 1=used) along with the count of cases where the outcome resource is used and not used.                                                                            | 17-19   |
| Table S4. Patient characteristics for the top and bottom five patient visits where predicted resource usage probabilities and actual resource utilization are not aligned.                                                                                                                        | 20-23   |
| Table S5. Examples of the top and bottom 5 facilities, among those with at least 30 patients, based on the percentage of mis- (left), over- (middle), and under- (right) utilization of resources along with the count of patients in each facility receiving the outcome imaging resource.       | 24      |
| Table S6. Logistic regression results for the association between misutilization by patient-visit (binary) and ICD class.                                                                                                                                                                         | 25      |
| Table S7. Odds ratios, corresponding 95% CIs, and p-values for the association between misutilization and ICD class.                                                                                                                                                                              | 26      |
| Table S8. Logistic regression results for the association between misutilization and age groups.                                                                                                                                                                                                  | 27      |
| Table S9. Odds ratios, corresponding 95% CIs, and p-values for the association between misutilization and age groups.                                                                                                                                                                             | 28      |
| Table S10. Logistic regression results for the associations between over- and under-utilization with payor type.                                                                                                                                                                                  | 29      |
| Table S11. Odds ratios, corresponding 95% CIs, and p-values for the association between over- and under-utilization with payor type.                                                                                                                                                              | 30      |
| Figure S1. Network analysis for associations (using tetrachoric correlations) among all competing resources and the response resource.                                                                                                                                                            | 31      |
| Figure S2. Network analysis for associations (using tetrachoric correlations) of resources for patient visits with the utilization of at least one competing resource.                                                                                                                            | 32      |
| Figure S3. Decision tree analysis to isolate different patterns in resource utilization by demonstrating the value of information of competing resources with the response resource.                                                                                                              | 33      |

**Table S1.** Definitions of competing resource variables.

| Competing Resources           | Types                                               |
|-------------------------------|-----------------------------------------------------|
| Computed Tomography Scan (CT) | CT Abdomen with & without Contrast                  |
|                               | CT Abdomen with Contrast                            |
|                               | CT Abdomen without Contrast                         |
|                               | CT Abdomen without Contrast Limited                 |
|                               | CT C-Spine with & without Contrast                  |
|                               | CT C-Spine with Contrast                            |
|                               | CT C-Spine without Contrast                         |
|                               | CT Cerebral Perfusion Analysis with Contrast        |
|                               | CT Chest with & without Contrast                    |
|                               | CT Chest with Contrast                              |
|                               | CT Chest without Contrast                           |
|                               | CT Colonography Diagnostic without Contrast         |
|                               | CT Facial/Sinus with & without Contrast             |
|                               | CT Facial/Sinus with Contrast                       |
|                               | CT Facial/Sinus without Contrast                    |
|                               | CT Head/Brain with & without Contrast               |
|                               | CT Head/Brain with Contrast                         |
|                               | CT Head/Brain without Contrast                      |
|                               | CT Heart Qn Calcium Eval without Contrast           |
|                               | CT Heart Struct/Morph Congenital Eval with contrast |
|                               | CT Heart Structure/Morphology Eval with contrast    |
|                               | CT L-Spine with & without Contrast                  |
|                               | CT L-Spine with contrast                            |
|                               | CT L-Spine without Contrast                         |
|                               | CT Lower Extremity with & without Contrast          |
|                               | CT Lower Extremity with contrast                    |
|                               | CT Lower Extremity without Contrast                 |
|                               | CT Lung Cancer Screening Low Dose                   |
|                               | CT Neck with & without Contrast                     |
|                               | CT Neck with contrast                               |
|                               | CT Neck without Contrast                            |
|                               | CT Orbit/Sella/Fossa/Ear with contrast              |
|                               | CT Orbit/Sella/Fossa/Ear without Contrast           |
|                               | CT Pelvis & Abdomen with & without Contrast 74178   |
|                               | CT Pelvis & Abdomen with contrast 74177             |
|                               | CT Pelvis & Abdomen without Contrast 74176          |
|                               | CT Pelvis with & without Contrast                   |
|                               | CT Pelvis with contrast                             |
|                               | CT Pelvis without Contrast                          |
|                               | CT T-Spine with & without Contrast                  |
|                               | CT T-Spine with contrast                            |
|                               | CT T-Spine without Contrast                         |
|                               | CT Unlisted Procedure                               |

|                 |                                                                            |
|-----------------|----------------------------------------------------------------------------|
|                 | CT Upper Extremity with contrast                                           |
|                 | CT Upper Extremity without Contrast                                        |
|                 | CTa Abdomen with Contrast & without If Performed                           |
|                 | CTa Abdominal Aorta with runoff                                            |
|                 | CTa Chest (Noncard) With Contrast & without If Performed                   |
|                 | CTa Head with Contrast & without If Performed                              |
|                 | CTa Heart Arteries, Grafts, Structural CT/Morphological with contrast      |
|                 | CTa Heart Coronaries, Morphological & Calcium Scoring                      |
|                 | CTa Heart Coronary Arteries & Morphology                                   |
|                 | CTa Heart Coronary Arteries Only                                           |
|                 | CTa Lower Extremity with Contrast & without If Performed                   |
|                 | CTa Neck with Contrast & without If Performed                              |
|                 | CTa Pelvis with Contrast & without If Performed                            |
|                 | CTa Upper Extremity with Contrast & without If Performed                   |
|                 | CTa, Abdomen & Pelvis, with Contrast, Include without Images, If Performed |
| Ultrasound (US) | US Abdomen                                                                 |
|                 | US Abdomen Limited                                                         |
|                 | US Abdominal Aorta - Abdominal Aortic Aneurysm                             |
|                 | US Adrenal                                                                 |
|                 | US And Duplex Doppler Kidney Transplant                                    |
|                 | US Aorta                                                                   |
|                 | US Breast Unilateral                                                       |
|                 | US Breast Unilateral Real-Time Limited                                     |
|                 | US Breast(S)                                                               |
|                 | US Chest                                                                   |
|                 | US Elastography                                                            |
|                 | US Elastography Parenchyma                                                 |
|                 | US Encephalogram                                                           |
|                 | US Extremity Nonvascular Complete                                          |
|                 | US Extremity Nonvascular Limited                                           |
|                 | US Gallbladder                                                             |
|                 | US Gastrointestinal Endoscopic                                             |
|                 | US Intraoperative                                                          |
|                 | US Kidney                                                                  |
|                 | US Kidney Transplant                                                       |
|                 | US Liver                                                                   |
|                 | US Neck                                                                    |
|                 | US Pelvis Non-Obstetric                                                    |
|                 | US Pelvis Non-Obstetric Limited                                            |
|                 | US Retroperitoneal                                                         |
|                 | US Retroperitoneal Limited                                                 |
|                 | US Scrotum                                                                 |
|                 | US Soft Tissue Head/Neck                                                   |
|                 | US Spleen                                                                  |

|           |                                                                             |
|-----------|-----------------------------------------------------------------------------|
|           | US Target Dynamic Microbubble US Contrast Characteristic Additional Lesions |
|           | US Target Dynamic Microbubble US Contrast Characteristic Initial Lesions    |
|           | US Thyroid                                                                  |
|           | US Transrectal Prostate                                                     |
|           | US Transrectal Prostate Volume Study                                        |
|           | US Unlisted Procedure                                                       |
|           | US Urinary Bladder                                                          |
| Xray (XR) | XR Abdomen 1 View Portable                                                  |
|           | XR Chest 1 View Portable                                                    |
|           | XR Chest 2 Views Portable                                                   |
|           | XR Fluoroscopy 15 Min                                                       |
|           | XR Fluoroscopy Cardiac                                                      |
|           | XR Knee <3 Views Portable                                                   |
|           | XR Spine 1 View Any Level Portable                                          |
|           | Mammogram Bilateral Diagnostic Digital                                      |
|           | Mammography Diagnostic Including Computer-Aided Detection Bilateral         |
|           | XR Abdomen 1 View                                                           |
|           | XR Abdomen 2 Views                                                          |
|           | XR Abdomen Anteroposterior Only (Kidney, Ureter, Bladder)                   |
|           | XR Abdomen Anteroposterior/Decubitus/Erect                                  |
|           | XR Abdomen Anteroposterior/Decubitus/Erect/Chest                            |
|           | XR Abdomen Anteroposterior/Oblique/Cone                                     |
|           | XR Abdomen Three Or More (3) Views                                          |
|           | XR Abscess/Fistula/Sinus Tract Study                                        |
|           | XR Angiogram Adrenal Unilateral                                             |
|           | XR Angiogram Each Additional Vessel                                         |
|           | XR Angiogram Extremity Bilateral                                            |
|           | XR Angiogram Extremity Unilateral                                           |
|           | XR Angiogram Iliac/Femoral Arteries Bilateral/Ipsilateral                   |
|           | XR Angiogram Internal Mammary                                               |
|           | XR Angiogram Non-Ophthalmic Fluorescent Vascular C9733                      |
|           | XR Angiogram Pelvic                                                         |
|           | XR Angiogram Pulmonary Bilateral                                            |
|           | XR Angiogram Pulmonary Non-Select                                           |
|           | XR Angiogram Pulmonary Unilateral                                           |
|           | XR Angiogram Renal Bilateral                                                |
|           | XR Angiogram Spinal                                                         |
|           | XR Angiogram Vertebral/Cervical Bilateral                                   |
|           | XR Angiogram Visceral                                                       |
|           | XR Angioplasty Peripheral                                                   |
|           | XR Angioplasty Venous                                                       |
|           | XR Ankle Ap & Lateral                                                       |
|           | XR Ankle Complete 3+ Views                                                  |
|           | XR Aortogram Abdominal With Serialography                                   |
|           | XR Aortogram Bilateral Ilio/Femoral Lower Extremities Serialography         |

|  |                                                                          |
|--|--------------------------------------------------------------------------|
|  | XR Aortogram Thoracic Without Serialography                              |
|  | XR Aortogram Thoracic With Serialography                                 |
|  | XR Bone Age Studies 77072                                                |
|  | XR Bone Density Dual Energy Xray Absorptiometry (DXA) Axial 77080        |
|  | XR Bone Density Dual Energy Xray Absorptiometry (DXA) Appendicular 77081 |
|  | XR Bone Survey Complete 77075                                            |
|  | XR Bone Survey Limited 77074                                             |
|  | XR C-Spine (Cervical) 4+ Views                                           |
|  | XR C-Spine (Cervical) Ap & Lateral                                       |
|  | XR C-Spine (Cervical) Complete Without Oblique/Flexion/Extension         |
|  | XR Calcaneus 2+ Views                                                    |
|  | XR Change Tube/Drainage Catheter                                         |
|  | XR Chest 1 View                                                          |
|  | XR Chest 1 View Anteroposterior                                          |
|  | XR Chest 1 View Posteroanterior                                          |
|  | XR Chest 2 Views                                                         |
|  | XR Chest 2 Views With Apical Lordotic                                    |
|  | XR Chest Decubitus 1 View 71035                                          |
|  | XR Chest Four Or More (4) Views                                          |
|  | XR Chest Single View                                                     |
|  | XR Chest Special Views                                                   |
|  | XR Chest Three (3) Views                                                 |
|  | XR Chest Without Obliques                                                |
|  | XR Cholangiogram Intraoperative                                          |
|  | XR Cholangiogram Postoperative (T-Tube)                                  |
|  | XR Cineradiography                                                       |
|  | XR Clavicle Complete                                                     |
|  | XR Colon Air Contrast Only 74270                                         |
|  | XR Colon Barium Enema                                                    |
|  | XR Colon Barium Enema With Air Contrast                                  |
|  | XR Colon Hypaque Enema                                                   |
|  | XR Colon Therapeutic Enema                                               |
|  | XR Cystogram 3+ Views                                                    |
|  | XR Cystourethrogram Retrograde                                           |
|  | XR Cystourethrogram Voiding                                              |
|  | XR Dilation Biliary Duct Stricture                                       |
|  | XR Dilation Intraluminal Esophagus                                       |
|  | XR Dilation Nephron/Ureter/Urethra                                       |
|  | XR Elbow Anteroposterior & Lateral                                       |
|  | XR Elbow Complete 3+ Views                                               |
|  | XR Endovascular Repair Descending Thoracic Aorta Complete                |
|  | XR Endovascular Repair Infra renal Aaa                                   |
|  | XR Endoscopic Retrograde Cholangiopancreatography                        |
|  | XR Endoscopic Retrograde Cholangiopancreatography Biliary Only           |
|  | XR Endoscopic Retrograde Cholangiopancreatography Pancreas Only          |

|  |                                                          |
|--|----------------------------------------------------------|
|  | XR Esophagus Single-Contrast                             |
|  | XR Eye Foreign Body                                      |
|  | XR Facial Bones Complete 3+ Views                        |
|  | XR Facial Bones Limited < 3 Views                        |
|  | XR Femur 1 View                                          |
|  | XR Femur Anteroposterior & Lateral                       |
|  | XR Femur Min 2 Views                                     |
|  | XR Finger(S) 2+ Views                                    |
|  | XR Fluoroscopy < 1 Hr                                    |
|  | XR Fluoroscopy > 1 Hr                                    |
|  | XR Fluoroscopy Abscess Drainage                          |
|  | XR Fluoroscopy Biopsy Intrathoracic                      |
|  | XR Fluoroscopy Central Venous Access Device Place OR Rem |
|  | XR Fluoroscopy Needle Place Biopsy/Aspiration/Injection  |
|  | XR Fluoroscopy Needle/Catheter Tip Localization          |
|  | XR Fluoroscopy Procedure Unlisted                        |
|  | XR Foot Anteroposterior & Lateral                        |
|  | XR Foot Complete 3+ Views                                |
|  | XR Forearm Anteroposterior & Lateral                     |
|  | XR Hand Complete 3+ Views                                |
|  | XR Hand Limited 2 Views                                  |
|  | XR Hip Bilateral With Pelvis 2 Views                     |
|  | XR Hip Bilateral With Pelvis 3-4 Views                   |
|  | XR Hip Bilateral With Pelvis Min 5 Views                 |
|  | XR Hip Intraoperative                                    |
|  | XR Hip Unilateral Complete 2+ Views                      |
|  | XR Hip Unilateral Limited 1 View                         |
|  | XR Hip Unilateral With Pelvis 1 View                     |
|  | XR Hip Unilateral With Pelvis 2-3 Views                  |
|  | XR Hip Unilateral With Pelvis Min 4 Views                |
|  | XR Hips Bilateral With Pelvis 4+ Views                   |
|  | XR Humerus 2+ Views                                      |
|  | XR Introduction of Long Gastrointestinal Tube            |
|  | XR Introduction of Renal Pelvis Catheter                 |
|  | XR Introduction of Ureteral Catheter/Stent               |
|  | XR Inferior Vena Cava Filter Placement                   |
|  | XR Joint Survey 1 View 77077                             |
|  | XR Knee <3 Views                                         |
|  | XR Knee 3 Views                                          |
|  | XR Knee Anteroposterior Standing Bilateral               |
|  | XR Knee Complete 4+ Views                                |
|  | XR L-Spine (Lumbar) Complete With Bending Views          |
|  | XR L-Spine (Lumbar) Complete Without obliques            |
|  | XR L-Spine (Lumbar) 3 Views                              |
|  | XR L-Spine (Lumbar) Anteroposterior & Lateral            |
|  | XR L-Spine (Lumbar) Bending Views Only                   |

|  |                                                                         |
|--|-------------------------------------------------------------------------|
|  | XR Lymphangiogram Pelvic/Abdomen Bilateral                              |
|  | XR Lymphangiogram Pelvic/Abdomen Unilateral                             |
|  | XR Mammary Ductogram Single 77053                                       |
|  | XR Mandible < 4 Views                                                   |
|  | XR Mandible Complete 4+ Views                                           |
|  | XR Myelogram L-Spine (Lumbar)                                           |
|  | XR Myelogram T-Spine (Thoracic)                                         |
|  | XR Myelogram Two Or More Regions                                        |
|  | XR Nasal Bones Complete 3+ Views                                        |
|  | XR Navicular Study                                                      |
|  | XR Neck Soft Tissue                                                     |
|  | XR Orbits Complete 4+ Views                                             |
|  | XR Orthopantomogram                                                     |
|  | XR Pelvis 1 Or 2 Views                                                  |
|  | XR Pelvis Complete 3+ Views                                             |
|  | XR Percutaneous Vertebroplasty/Vertebral Augmentation/Sacroplasty 72291 |
|  | XR Pharynx/Esophagus Swallow Cine/Video                                 |
|  | XR Placement Biliary Drainage Catheter                                  |
|  | XR Placement Gastrostomy Tube                                           |
|  | XR Portogram With Hemodynamics                                          |
|  | XR Portogram Without Hemodynamics                                       |
|  | XR Renal Cyst Study                                                     |
|  | XR Ribs Bilateral 3+ Views                                              |
|  | XR Ribs Bilateral With Chest 4+ Views                                   |
|  | XR Ribs Unilateral 2 Views                                              |
|  | XR Ribs Unilateral With Chest 3+ Views                                  |
|  | XR Sacrum/Coccyx 2+ Views                                               |
|  | XR Scapula Complete                                                     |
|  | XR Setup                                                                |
|  | XR Shoulder Complete 2+ Views                                           |
|  | XR Shoulder Limited 1 View                                              |
|  | XR Shuntogram Nonvascular                                               |
|  | XR Sacroiliac Joints < 3 Views                                          |
|  | XR Sacroiliac Joints 3+ Views                                           |
|  | XR Sinuses Complete 3+ Views                                            |
|  | XR Sinuses Limited < 3 Views                                            |
|  | XR Skull 3 Views                                                        |
|  | XR Skull Complete 4+ Views                                              |
|  | XR Skull Limited < 4 Views                                              |
|  | XR Small Intestine Bowel                                                |
|  | XR Speech Evaluation Complex                                            |
|  | XR Spine 1 View Any Level                                               |
|  | XR Spine Entire Lumbar Thoracic Skull Cervical 2 -3 Views               |
|  | XR Spine Entire Lumbar Thoracic Skull Cervical One View                 |
|  | XR Sternum 2+ Views                                                     |

|                 |                                                                             |
|-----------------|-----------------------------------------------------------------------------|
|                 | XR Stress View(S) 77071                                                     |
|                 | XR Surgical Specimen                                                        |
|                 | XR T-L-Spine (Thoracolumbar) Anteroposterior & Lateral                      |
|                 | XR T-Spine (Thoracic) Anteroposterior & Lateral                             |
|                 | XR T-Spine (Thoracic) Complete                                              |
|                 | XR T-Spine (Thoracic) With Swimmers View                                    |
|                 | XR Teeth Complete                                                           |
|                 | XR Temporomandibular Joint Bilateral                                        |
|                 | XR Tibia/Fibula Anteroposterior & Lateral                                   |
|                 | XR Toe(S) 2+ Views                                                          |
|                 | XR Transcatheter Angiogram Existing Catheter                                |
|                 | XR Transcatheter Retrieval Foreign Body                                     |
|                 | XR Transcatheter Therapy Embolization                                       |
|                 | XR Transcatheter Therapy Infusion                                           |
|                 | XR Upper gastrointestinal With Air Contrast With Kidney, Ureter, Bladder    |
|                 | XR Upper gastrointestinal With Air Contrast Without Kidney, Ureter, Bladder |
|                 | XR Upper gastrointestinal With Air Contrast With Small Intestine Bowel      |
|                 | XR Upper gastrointestinal With Kidney, Ureter, Bladder                      |
|                 | XR Upper gastrointestinal Without Kidney, Ureter, Bladder                   |
|                 | XR Upper gastrointestinal With Small Intestine Bowel                        |
|                 | XR Unlisted Procedure                                                       |
|                 | XR Urogram Antegrade                                                        |
|                 | XR Urogram Intravenous pyelogram (IVP)                                      |
|                 | XR Urogram Retrograde                                                       |
|                 | XR Urogram With Nephrotomogram                                              |
|                 | XR Venocavagram Inferior                                                    |
|                 | XR Venocavagram Inferior Each Additional                                    |
|                 | XR Venocavagram Superior                                                    |
|                 | XR Venocavagram Superior Each Additional                                    |
|                 | XR Venogram Extremity Bilateral                                             |
|                 | XR Venogram Extremity Unilateral                                            |
|                 | XR Wrist Anteroposterior & Lateral                                          |
|                 | XR Wrist Complete 3+ Views                                                  |
| Special Imaging | CT Followup/Limited                                                         |
|                 | CT Guided Abscess Drainage                                                  |
|                 | CT Guided Cyst Aspiration                                                   |
|                 | CT Guided Localization Stereotactic 77011                                   |
|                 | CT Guided Needle Placement 77012                                            |
|                 | CT Guided Radiation Therapy Placement 77014                                 |
|                 | CT Guided Tissue Ablation                                                   |
|                 | CT Reconstruction                                                           |
|                 | CT Reconstruction With Contrast                                             |
|                 | CT Reconstruction Without Contrast                                          |
|                 | MRI Reconstruction                                                          |
|                 | NM Abscess Localize Limited                                                 |



|                 |          |                                                                              |
|-----------------|----------|------------------------------------------------------------------------------|
|                 |          | NM Abscess Localize Single-photon emission computed tomography               |
|                 |          | NM Abscess Localize Whole Body                                               |
|                 |          | NM Computer Analysis < 30 Min                                                |
|                 |          | NM Injection Radiopharmaceutical Localization Non-Imaging Study, Intravenous |
|                 |          | US Guide & Monitor of Parenchymal Tissue Ablation                            |
|                 |          | US Guide for Vascular Access                                                 |
|                 |          | US Guide Interstitial Radioelement Application                               |
|                 |          | US Guide Intraoperative                                                      |
|                 |          | US Guided Abscess Drainage                                                   |
|                 |          | US Guided Compression Repair                                                 |
|                 |          | US Guided Cyst Aspiration                                                    |
|                 |          | US Guided Needle Biopsy                                                      |
|                 |          | US Guided Pericardiocentesis                                                 |
|                 |          | US Guided Thoracentesis/Paracentesis                                         |
|                 |          | XR, CT, MRI, US 3D Render Any Tomosynthesis Modal Without Postprocess        |
|                 |          | XR, CT, MRI, US 3D Render Any Tomosynthesis Modal With Postprocess           |
| Nuclear<br>(NM) | Medicine | NM Bone 3 Phase                                                              |
|                 |          | NM Bone Limited                                                              |
|                 |          | NM Bone Marrow Limited                                                       |
|                 |          | NM Bone Marrow Multiple                                                      |
|                 |          | NM Bone Multiple                                                             |
|                 |          | NM Bone Single-photon emission computed tomography                           |
|                 |          | NM Bone Whole Body                                                           |
|                 |          | NM Bowel                                                                     |
|                 |          | NM Brain < 4 Static Views With Flow                                          |
|                 |          | NM Brain 4 Static Views With Flow                                            |
|                 |          | NM Cardiac Blood Pool Multiple                                               |
|                 |          | NM Cardiac Blood Pool Single                                                 |
|                 |          | NM Cisternogram                                                              |
|                 |          | NM Cardiovascular Procedure Unlisted                                         |
|                 |          | NM Diagnostic Procedure Unlisted 78999                                       |
|                 |          | NM Gastric Emptying                                                          |
|                 |          | NM Gastrointestinal Blood Loss                                               |
|                 |          | NM Genitourinary Procedure Unlisted                                          |
|                 |          | NM Hepatobiliary Ducts                                                       |
|                 |          | NM Kidney Flow & Function Sing With Pharmacy 78708                           |
|                 |          | NM Kidney Scan Morphology                                                    |
|                 |          | NM Kidney Scan With Flow                                                     |
|                 |          | NM Kidney Scan With Flow & Function                                          |
|                 |          | NM Kidney With Flow & Function Multi With & Without Pharmaceuticals          |
|                 |          | NM Kidney With Flow & Function Single With Pharmaceuticals                   |
|                 |          | NM Liver & Spleen                                                            |
|                 |          | NM Localization Tumor Planar Single Area Single Day Imaging                  |
|                 |          | NM Localization Tumor Planar Whole Body Single Day Imaging                   |

|                                                                         |                                                                                                                    |
|-------------------------------------------------------------------------|--------------------------------------------------------------------------------------------------------------------|
|                                                                         | NM Localization Tumor Single-photon emission computed tomography Single Area Single Day Imaging                    |
|                                                                         | NM Lymph System                                                                                                    |
|                                                                         | NM Musculoskeletal Procedure Unlisted                                                                              |
|                                                                         | NM Myocardial Infarction                                                                                           |
|                                                                         | NM Myocardial Infarction Single-photon emission computed tomography                                                |
|                                                                         | NM Myocardial Infarction With Ejection Fraction 1st Pass                                                           |
|                                                                         | NM Myocardial Perfusion Multiple                                                                                   |
|                                                                         | NM Myocardial Perfusion Multiple Planar With Wall,Ejection Fraction, Rest/Stress                                   |
|                                                                         | NM Myocardial Perfusion Multiple Single-photon emission computed tomography                                        |
|                                                                         | NM Myocardial Perfusion Single Single-photon emission computed tomography With Wall,Ejection Fraction, Rest/Stress |
|                                                                         | NM Myocardial Perfusion Single Single-photon emission computed tomography                                          |
|                                                                         | NM Myocardial Perfusion Wall Motion                                                                                |
|                                                                         | NM Parathyroid                                                                                                     |
|                                                                         | NM Pulmonary Perfusion Part                                                                                        |
|                                                                         | NM Pulmonary Perfusion Part With Ventilation                                                                       |
|                                                                         | NM Pulmonary Perfusion Part With Ventilation R&W                                                                   |
|                                                                         | NM Pulmonary Perfusion Particulate With Aerosol Ventilation                                                        |
|                                                                         | NM Pulmonary Vent Gas Single R&W                                                                                   |
|                                                                         | NM Pulmonary Vent/Perfusion Difference                                                                             |
|                                                                         | NM Respiratory Procedure Unlisted                                                                                  |
|                                                                         | NM Shunt Evaluation                                                                                                |
|                                                                         | NM Thyroid Scan With Uptake Single                                                                                 |
|                                                                         | NM Urea Breath Test C-14 Analysis                                                                                  |
|                                                                         | NM Vascular Flow                                                                                                   |
|                                                                         | NM Whole Blood Volume                                                                                              |
| Magnetic Resonance Imaging & Magnetic Resonance Angiography (MRI & MRA) | MRA Abdomen                                                                                                        |
|                                                                         | MRA Abdomen With & Without Contrast                                                                                |
|                                                                         | MRA Chest                                                                                                          |
|                                                                         | MRA Head With & Without Contrast                                                                                   |
|                                                                         | MRA Head With contrast                                                                                             |
|                                                                         | MRA Head Without Contrast                                                                                          |
|                                                                         | MRA Head/Neck                                                                                                      |
|                                                                         | MRA Lower Extremity                                                                                                |
|                                                                         | MRA Neck With & Without Contrast                                                                                   |
|                                                                         | MRA Neck With contrast                                                                                             |
|                                                                         | MRA Neck Without Contrast                                                                                          |
|                                                                         | MRA Pelvis                                                                                                         |
|                                                                         | MRA Spine                                                                                                          |
|                                                                         | MRI Abdomen With & Without Contrast                                                                                |
|                                                                         | MRI Abdomen With contrast                                                                                          |
|                                                                         | MRI Abdomen Without Contrast                                                                                       |

|                       |                                                                                      |
|-----------------------|--------------------------------------------------------------------------------------|
|                       | MRI Brain During Intracranial Procedure With & Without Contrast                      |
|                       | MRI Brain Function No MD/Psychologist Administration                                 |
|                       | MRI Brain With & Without Contrast                                                    |
|                       | MRI Brain With contrast                                                              |
|                       | MRI Brain Without Contrast                                                           |
|                       | MRI C-Spine With & Without Contrast                                                  |
|                       | MRI C-Spine With contrast                                                            |
|                       | MRI C-Spine Without Contrast                                                         |
|                       | MRI Cardiac Function Complete with Flow and Velocity Quantification & Stress Imaging |
|                       | MRI Cardiac Function Complete                                                        |
|                       | MRI Cardiac Function Complete With Stress Imaging                                    |
|                       | MRI Cardiac Velocity Flow Mapping                                                    |
|                       | MRI Cardiac Without Contrast                                                         |
|                       | MRI Chest With & Without Contrast                                                    |
|                       | MRI Chest Without Contrast                                                           |
|                       | MRI L-Spine With & Without Contrast                                                  |
|                       | MRI L-Spine With contrast                                                            |
|                       | MRI L-Spine Without Contrast                                                         |
|                       | MRI L-Spine Without Contrast Limited                                                 |
|                       | MRI Lower Extremity Joint With & Without Contrast                                    |
|                       | MRI Lower Extremity Joint With contrast                                              |
|                       | MRI Lower Extremity Joint Without Contrast                                           |
|                       | MRI Lower Extremity With & Without Contrast                                          |
|                       | MRI Lower Extremity With contrast                                                    |
|                       | MRI Lower Extremity Without Contrast                                                 |
|                       | MRI Orbit/Face/Neck With & Without Contrast                                          |
|                       | MRI Orbit/Face/Neck With contrast                                                    |
|                       | MRI Orbit/Face/Neck Without Contrast                                                 |
|                       | MRI Pelvis With & Without Contrast                                                   |
|                       | MRI Pelvis With contrast                                                             |
|                       | MRI Pelvis Without Contrast                                                          |
|                       | MRI Spectroscopy                                                                     |
|                       | MRI T-Spine With & Without Contrast                                                  |
|                       | MRI T-Spine With contrast                                                            |
|                       | MRI T-Spine Without Contrast                                                         |
|                       | MRI Unlisted Procedure                                                               |
|                       | MRI Upper Extremity Joint With & Without Contrast                                    |
|                       | MRI Upper Extremity Joint Without Contrast                                           |
|                       | MRI Upper Extremity With & Without Contrast                                          |
|                       | MRI Upper Extremity With contrast                                                    |
|                       | MRI Upper Extremity Without Contrast                                                 |
| Miscellaneous Imaging | CT Extended Room Time 30 Minutes                                                     |
|                       | Injection Sinus US Tract/Sinogram                                                    |
|                       | US Callback Fee                                                                      |
|                       | US Follow Up                                                                         |

|  |                                    |
|--|------------------------------------|
|  | US Portable Fee                    |
|  | XR Arteriogram Setup               |
|  | XR Consultation                    |
|  | XR Film Copy                       |
|  | XR Outside Facility                |
|  | XR Portable Fee                    |
|  | XR Room Time 1st Hour              |
|  | XR Room Time 30 Minutes            |
|  | XR Room Time Additional 30 Minutes |
|  | XR Statim Fee                      |
|  | XR Technician in OR 30 Minutes     |
|  | XR Technician in OR Flat Rate      |

**Table S2.** Multivariate logistic regression analysis results with coefficients (Coef), standard errors (SE), and p-values (p) for the three models: (a) patient characteristics and competing resource utilization; (b) patient characteristics only; and (c) competing resource utilization only.

|                                                     | Model 1: Patient and competing resource characteristics |        |         | Model 2: Patient characteristics only |        |         | Model 3: Competing resource characteristics only |        |         |
|-----------------------------------------------------|---------------------------------------------------------|--------|---------|---------------------------------------|--------|---------|--------------------------------------------------|--------|---------|
|                                                     | Coef                                                    | SE     | p       | Coef                                  | SE     | p       | Coef                                             | SE     | p       |
| (Intercept)                                         | -2.4499                                                 | 0.6054 | <0.0001 | -1.7827                               | 0.5838 | 0.0023  | -2.9967                                          | 0.0305 | <0.0001 |
| Length of Stay                                      | 0.0416                                                  | 0.0027 | <0.0001 | 0.0555                                | 0.0027 | <0.0001 |                                                  |        |         |
| History of Malignancy                               | 0.0383                                                  | 0.0582 | 0.5108  | 0.0474                                | 0.0573 | 0.4087  |                                                  |        |         |
| Procedural Cost Type                                | 0.1248                                                  | 0.0320 | <0.0001 | 0.1889                                | 0.0314 | <0.0001 |                                                  |        |         |
| Secondary ICD Classification                        | -0.7067                                                 | 0.0907 | <0.0001 | -0.8674                               | 0.0854 | <0.0001 |                                                  |        |         |
| <b>Age (Reference: ≤45)</b>                         |                                                         |        |         |                                       |        |         |                                                  |        |         |
| 46-50                                               | -0.4971                                                 | 0.3848 | 0.1964  | -0.5748                               | 0.3731 | 0.1234  |                                                  |        |         |
| 51-55                                               | -0.3240                                                 | 0.3352 | 0.3338  | -0.4914                               | 0.3227 | 0.1278  |                                                  |        |         |
| 56-60                                               | -0.2266                                                 | 0.3224 | 0.4821  | -0.3333                               | 0.3094 | 0.2814  |                                                  |        |         |
| 61-65                                               | -0.2135                                                 | 0.3194 | 0.5039  | -0.3519                               | 0.3064 | 0.2508  |                                                  |        |         |
| 66-70                                               | -0.1912                                                 | 0.3201 | 0.5503  | -0.3231                               | 0.3071 | 0.2927  |                                                  |        |         |
| 71-75                                               | -0.2948                                                 | 0.3204 | 0.3574  | -0.4180                               | 0.3074 | 0.1739  |                                                  |        |         |
| 76-80                                               | -0.2710                                                 | 0.3207 | 0.3981  | -0.4090                               | 0.3077 | 0.1838  |                                                  |        |         |
| 81-85                                               | -0.2844                                                 | 0.3213 | 0.3760  | -0.4094                               | 0.3083 | 0.1843  |                                                  |        |         |
| > 85                                                | -0.1945                                                 | 0.3215 | 0.5453  | -0.3378                               | 0.3085 | 0.2735  |                                                  |        |         |
| <b>Race (Reference: White)</b>                      |                                                         |        |         |                                       |        |         |                                                  |        |         |
| American Indian                                     | 0.1365                                                  | 0.2327 | 0.5575  | 0.1112                                | 0.2266 | 0.6236  |                                                  |        |         |
| Asian                                               | -0.1835                                                 | 0.1208 | 0.1285  | -0.1774                               | 0.1185 | 0.1344  |                                                  |        |         |
| Black                                               | -0.0258                                                 | 0.0407 | 0.5264  | -0.0061                               | 0.0402 | 0.8786  |                                                  |        |         |
| Other                                               | -0.1762                                                 | 0.0679 | 0.0095  | -0.1834                               | 0.0668 | 0.0061  |                                                  |        |         |
| Pacific Islander                                    | -0.0257                                                 | 0.2380 | 0.9141  | -0.0287                               | 0.2366 | 0.9034  |                                                  |        |         |
| Unknown                                             | -0.0786                                                 | 0.1161 | 0.4986  | -0.0895                               | 0.1155 | 0.4383  |                                                  |        |         |
| <b>Payor Type (Reference: Medicare Traditional)</b> |                                                         |        |         |                                       |        |         |                                                  |        |         |
| Charity or Indigent                                 | 0.3617                                                  | 0.3674 | 0.3248  | 0.3196                                | 0.3575 | 0.3713  |                                                  |        |         |
| Commercial Indemnity                                | -0.1773                                                 | 0.0971 | 0.0679  | -0.1877                               | 0.0956 | 0.0496  |                                                  |        |         |
| Direct Employer Contract                            | -0.0862                                                 | 0.4826 | 0.8582  | -0.0936                               | 0.4792 | 0.8451  |                                                  |        |         |

|                                                                                                  |         |        |         |         |        |         |  |  |  |
|--------------------------------------------------------------------------------------------------|---------|--------|---------|---------|--------|---------|--|--|--|
| Managed Care Capitated                                                                           | -0.4570 | 0.3624 | 0.2073  | -0.4792 | 0.3617 | 0.1852  |  |  |  |
| Managed Care Non Capitated                                                                       | -0.2738 | 0.0671 | <0.0001 | -0.2951 | 0.0662 | <0.0001 |  |  |  |
| Medicaid Managed Care Capitated                                                                  | 0.0293  | 0.2130 | 0.8904  | -0.0105 | 0.2089 | 0.9599  |  |  |  |
| Medicaid Managed Care Non Capitated                                                              | -0.3138 | 0.1196 | 0.0087  | -0.3404 | 0.1177 | 0.0038  |  |  |  |
| Medicaid Traditional                                                                             | -0.0322 | 0.1226 | 0.7926  | -0.0173 | 0.1209 | 0.8863  |  |  |  |
| Medicare Managed Care Capitated                                                                  | -0.1977 | 0.0633 | 0.0018  | -0.2909 | 0.0624 | <0.0001 |  |  |  |
| Medicare Managed Care Non Capitated                                                              | -0.0103 | 0.0386 | 0.7895  | 0.0052  | 0.0381 | 0.8919  |  |  |  |
| Other                                                                                            | -0.5047 | 0.1623 | 0.0019  | -0.7581 | 0.1615 | <0.0001 |  |  |  |
| Other Government Payers                                                                          | -0.0402 | 0.1031 | 0.6969  | -0.0804 | 0.1019 | 0.4304  |  |  |  |
| Self Pay                                                                                         | 0.1834  | 0.1560 | 0.2397  | 0.2020  | 0.1521 | 0.1842  |  |  |  |
| Workers Compensation                                                                             | -0.2284 | 0.5362 | 0.6701  | -0.1548 | 0.5322 | 0.7711  |  |  |  |
| <b>Point of Origin (Reference: Non-Healthcare Facility (Physician Referral))</b>                 |         |        |         |         |        |         |  |  |  |
| Clinic                                                                                           | -0.1323 | 0.0538 | 0.0139  | -0.1488 | 0.0530 | 0.0050  |  |  |  |
| Court/Law Enforcement                                                                            | 0.0823  | 0.5770 | 0.8866  | 0.0503  | 0.5766 | 0.9304  |  |  |  |
| Information Not Available                                                                        | -0.4294 | 0.1975 | 0.0297  | -0.6701 | 0.1957 | 0.0006  |  |  |  |
| Transfer from a Hospital (Different Facility)                                                    | -0.6268 | 0.0748 | <0.0001 | -0.6538 | 0.0735 | <0.0001 |  |  |  |
| Transfer from an SNF or ICF                                                                      | -0.0153 | 0.1091 | 0.8883  | -0.0595 | 0.1074 | 0.5799  |  |  |  |
| Transfer from Ambulatory Surgical Center                                                         | -0.9666 | 0.7443 | 0.1940  | -1.0202 | 0.7445 | 0.1706  |  |  |  |
| Transfer from Another Healthcare Facility                                                        | -0.3345 | 0.1669 | 0.0450  | -0.3357 | 0.1631 | 0.0396  |  |  |  |
| Transfer from Hospice and is Under a Hospice Plan of Care or Enrolled in a Hospice Program       | -1.3402 | 1.1876 | 0.2591  | -1.3238 | 1.1502 | 0.2498  |  |  |  |
| Transfer from Hospital Inpatient in the Same Facility Resulting in a Separate Claim to the Payor | -0.0738 | 0.2173 | 0.7343  | -0.1320 | 0.2141 | 0.5375  |  |  |  |
| <b>Discharge Status (Reference: Court/Law Enforcement)</b>                                       |         |        |         |         |        |         |  |  |  |
| Expired                                                                                          | 0.6210  | 0.5174 | 0.2300  | 0.4947  | 0.4997 | 0.3222  |  |  |  |
| Home Health Organization                                                                         | 0.3047  | 0.5142 | 0.5534  | 0.2308  | 0.4965 | 0.6420  |  |  |  |
| Home or Self Care                                                                                | 0.2941  | 0.5133 | 0.5667  | 0.1847  | 0.4956 | 0.7094  |  |  |  |
| Hospice Home                                                                                     | 0.5320  | 0.5181 | 0.3045  | 0.3694  | 0.5003 | 0.4604  |  |  |  |
| Hospice Medical Facility                                                                         | 0.6450  | 0.5196 | 0.2144  | 0.5011  | 0.5019 | 0.3181  |  |  |  |
| Left Against Medical Advice                                                                      | 0.3929  | 0.5537 | 0.4780  | 0.2319  | 0.5369 | 0.6658  |  |  |  |
| Other                                                                                            | 0.5767  | 0.5324 | 0.2788  | 0.3965  | 0.5153 | 0.4416  |  |  |  |
| Transferred to a Long Term Care Hospital                                                         | 0.5096  | 0.5402 | 0.3455  | 0.4014  | 0.5226 | 0.4424  |  |  |  |
| Transferred to Another Rehabilitation Facility                                                   | 0.0639  | 0.5221 | 0.9025  | -0.0570 | 0.5044 | 0.9101  |  |  |  |

|                                                                                |         |        |         |         |        |         |  |  |  |
|--------------------------------------------------------------------------------|---------|--------|---------|---------|--------|---------|--|--|--|
| Transferred to ICF                                                             | 0.1109  | 0.5598 | 0.8429  | 0.0325  | 0.5420 | 0.9522  |  |  |  |
| Transferred to Other Facility                                                  | 0.6383  | 0.5241 | 0.2233  | 0.5416  | 0.5065 | 0.2849  |  |  |  |
| Transferred to SNF                                                             | 0.3388  | 0.5146 | 0.5103  | 0.2388  | 0.4969 | 0.6308  |  |  |  |
| Transferred to Swing Bed                                                       | 0.3723  | 0.5799 | 0.5209  | 0.3162  | 0.5620 | 0.5737  |  |  |  |
| <b>Medicare Severity Diagnosis Related Groups (MS-DRGs) (Reference: Other)</b> |         |        |         |         |        |         |  |  |  |
| Acute Myocardial Infarction (Discharged Alive)                                 | -0.9293 | 0.1883 | <0.0001 | -0.8425 | 0.1872 | <0.0001 |  |  |  |
| Cardiac Arrhythmia Conduction Disorders                                        | -1.0121 | 0.1980 | <0.0001 | -0.9811 | 0.1972 | <0.0001 |  |  |  |
| Esophagitis Gastroenteritis Miscellaneous Digest Disorders                     | 0.8304  | 0.1103 | <0.0001 | 0.7292  | 0.1090 | <0.0001 |  |  |  |
| Gastrointestinal Hemorrhage                                                    | 0.1241  | 0.1046 | 0.2354  | 0.0548  | 0.1030 | 0.5947  |  |  |  |
| Heart Failure (Shock)                                                          | -0.7887 | 0.1168 | <0.0001 | -0.7221 | 0.1156 | <0.0001 |  |  |  |
| Infectious Parasitic Diseases W.O.R. Procedure                                 | 0.8572  | 0.0997 | <0.0001 | 0.9308  | 0.0978 | <0.0001 |  |  |  |
| Intracranial Hemorrhage or Cerebral Infarction                                 | -0.5247 | 0.1812 | 0.0038  | -0.7486 | 0.1788 | <0.0001 |  |  |  |
| Kidney/ Urinary Tract Infections                                               | 0.8723  | 0.0872 | <0.0001 | 0.8424  | 0.0859 | <0.0001 |  |  |  |
| Major Joint Replacement or Reattachment of lower extremity                     | -1.4404 | 0.2318 | <0.0001 | -1.3702 | 0.2305 | <0.0001 |  |  |  |
| Major Male Pelvic Procedures                                                   | -1.8899 | 0.1163 | <0.0001 | -2.2828 | 0.1113 | <0.0001 |  |  |  |
| Malignancy of Male Reproductive System                                         | 0.0520  | 0.1137 | 0.6473  | -0.0141 | 0.1093 | 0.8972  |  |  |  |
| Miscellaneous Disorders of Nutrition Metabolism Fluids Electrolytes            | -0.4937 | 0.1340 | 0.0002  | -0.5570 | 0.1328 | <0.0001 |  |  |  |
| Other Kidney/Urinary Tract Diagnoses                                           | 0.7527  | 0.0679 | <0.0001 | 0.7444  | 0.0665 | 0.0000  |  |  |  |
| Pathological Fractures Musculoskeletal Connective Tissue Malignancy            | -0.3411 | 0.1261 | 0.0068  | -0.3859 | 0.1240 | 0.0019  |  |  |  |
| Per-cutaneous Cardiovascular procedure with Stent                              | -1.2149 | 0.2403 | <0.0001 | -1.0885 | 0.2377 | <0.0001 |  |  |  |
| Renal Failure                                                                  | 0.9536  | 0.0641 | <0.0001 | 1.0765  | 0.0619 | <0.0001 |  |  |  |
| Septicemia or Severe Sepsis W.O MV 96 Hours                                    | 0.5185  | 0.0488 | <0.0001 | 0.5454  | 0.0480 | <0.0001 |  |  |  |
| Simple Pneumonia Pleurisy                                                      | -0.6407 | 0.1358 | <0.0001 | -0.6383 | 0.1346 | <0.0001 |  |  |  |
| <b>Comorbidities</b>                                                           |         |        |         |         |        |         |  |  |  |
| Diabetes - Complicated                                                         | -0.0434 | 0.0394 | 0.2715  | -0.0369 | 0.0389 | 0.3431  |  |  |  |
| Diabetes - Uncomplicated                                                       | 0.1198  | 0.0501 | 0.0167  | 0.1098  | 0.0495 | 0.0265  |  |  |  |
| Other Neurological Disorders                                                   | -0.1569 | 0.0441 | 0.0004  | -0.1880 | 0.0430 | <0.0001 |  |  |  |
| Congestive Heart Failure                                                       | -0.2358 | 0.0468 | <0.0001 | -0.1907 | 0.0460 | <0.0001 |  |  |  |
| Obesity                                                                        | 0.0203  | 0.0485 | 0.6761  | 0.0164  | 0.0479 | 0.7319  |  |  |  |
| Fluid and Electrolyte Disorders                                                | 0.4147  | 0.0337 | <0.0001 | 0.4832  | 0.0332 | <0.0001 |  |  |  |
| Lymphoma                                                                       | -0.0650 | 0.1174 | 0.5803  | -0.0424 | 0.1155 | 0.7135  |  |  |  |
| Chronic Pulmonary Disease                                                      | -0.0990 | 0.0383 | 0.0098  | -0.0991 | 0.0378 | 0.0088  |  |  |  |
| Paralysis                                                                      | -0.5102 | 0.1212 | <0.0001 | -0.6019 | 0.1201 | <0.0001 |  |  |  |

|                                          |         |        |         |         |        |         |         |        |         |
|------------------------------------------|---------|--------|---------|---------|--------|---------|---------|--------|---------|
| Cardiac Arrhythmia                       | -0.1024 | 0.0354 | 0.0039  | -0.0841 | 0.0349 | 0.0160  |         |        |         |
| Renal Failure                            | 0.7217  | 0.0477 | <0.0001 | 0.7914  | 0.0470 | <0.0001 |         |        |         |
| Hypertension - Complicated               | 0.1432  | 0.0504 | 0.0045  | 0.1476  | 0.0497 | 0.0030  |         |        |         |
| Hypertension - Uncomplicated             | 0.0628  | 0.0425 | 0.1400  | 0.0723  | 0.0420 | 0.0855  |         |        |         |
| Pulmonary Circulation Disorders          | -0.2162 | 0.0678 | 0.0014  | -0.2032 | 0.0670 | 0.0024  |         |        |         |
| Coagulopathy                             | -0.0356 | 0.0472 | 0.4496  | -0.0176 | 0.0464 | 0.7043  |         |        |         |
| Weight Loss                              | -0.0474 | 0.0434 | 0.2752  | -0.0378 | 0.0429 | 0.3777  |         |        |         |
| Liver Disease                            | 0.2866  | 0.0644 | <0.0001 | 0.4023  | 0.0630 | <0.0001 |         |        |         |
| Metastatic Cancer                        | 0.1851  | 0.0335 | <0.0001 | 0.2332  | 0.0326 | <0.0001 |         |        |         |
| Peripheral Vascular Disorders            | -0.0526 | 0.0498 | 0.2908  | -0.0471 | 0.0491 | 0.3372  |         |        |         |
| Depression                               | -0.0872 | 0.0517 | 0.0913  | -0.1017 | 0.0511 | 0.0463  |         |        |         |
| Rheumatoid Arthritis Collagen            | -0.1183 | 0.1136 | 0.2976  | -0.1042 | 0.1118 | 0.3517  |         |        |         |
| Hypothyroidism                           | -0.0335 | 0.0510 | 0.5110  | -0.0422 | 0.0503 | 0.4016  |         |        |         |
| Anemia Deficiency                        | 0.1027  | 0.0589 | 0.0810  | 0.1236  | 0.0580 | 0.0331  |         |        |         |
| Valvular Disease                         | -0.1658 | 0.0558 | 0.0030  | -0.1472 | 0.0551 | 0.0076  |         |        |         |
| Drug Abuse                               | -0.1257 | 0.1039 | 0.2265  | -0.1223 | 0.1025 | 0.2326  |         |        |         |
| Alcohol Abuse                            | -0.1300 | 0.0823 | 0.1141  | -0.0918 | 0.0811 | 0.2577  |         |        |         |
| <b>Competing Resources</b>               |         |        |         |         |        |         |         |        |         |
| CT Scans (Excluding Outcome Resource)    | -0.1680 | 0.0340 | <0.0001 |         |        |         | 0.0557  | 0.0315 | 0.0773  |
| Miscellaneous                            | 0.1196  | 0.0943 | 0.2048  |         |        |         | 0.1839  | 0.0898 | 0.0405  |
| MRI and MRA                              | -0.1815 | 0.0503 | 0.0003  |         |        |         | -0.1860 | 0.0460 | <0.0001 |
| Nuclear Medicine                         | 0.7237  | 0.0514 | <0.0001 |         |        |         | 0.8431  | 0.0473 | <0.0001 |
| Special Imaging Techniques - All Imaging | 0.4301  | 0.0484 | <0.0001 |         |        |         | 0.6484  | 0.0449 | <0.0001 |
| Ultrasound                               | 0.5764  | 0.0366 | <0.0001 |         |        |         | 1.1377  | 0.0332 | <0.0001 |
| X - Ray                                  | 0.4844  | 0.0403 | <0.0001 |         |        |         | 0.9148  | 0.0363 | <0.0001 |



**Table S3.** Binary representation of competing resources indicating the usage of different combinations of resources (0=not used; 1=used) along with the count of cases where the outcome resource is used and not used.

| Binary Representation of Covariates <sup>1</sup> | Cases with Observed Combination, N (%) | Cases where Response Resource was Not Used, N (%) | Cases where Response Resource was Used, N (%) |
|--------------------------------------------------|----------------------------------------|---------------------------------------------------|-----------------------------------------------|
| 0000000                                          | 17,635 (34.5)                          | 17,052 (96.69)                                    | 583 (3.31)                                    |
| 0000001                                          | 14 (0.03)                              | 11 (78.57)                                        | 3 (21.43)                                     |
| 0000010                                          | 147 (0.29)                             | 92 (62.59)                                        | 55 (37.41)                                    |
| 0000100                                          | 625 (1.22)                             | 483 (77.28)                                       | 142 (22.72)                                   |
| 0000101                                          | 5 (0.01)                               | 1 (20)                                            | 4 (80)                                        |
| 0000110                                          | 37 (0.07)                              | 15 (40.54)                                        | 22 (59.46)                                    |
| 0001000                                          | 265 (0.52)                             | 244 (92.08)                                       | 21 (7.92)                                     |
| 0001001                                          | 1 (0)                                  | 1 (100)                                           | 0 (0)                                         |
| 0001010                                          | 12 (0.02)                              | 10 (83.33)                                        | 2 (16.67)                                     |
| 0001100                                          | 43 (0.08)                              | 32 (74.42)                                        | 11 (25.58)                                    |
| 0001101                                          | 1 (0)                                  | 1 (100)                                           | 0 (0)                                         |
| 0001110                                          | 5 (0.01)                               | 2 (40)                                            | 3 (60)                                        |
| 0010000                                          | 178 (0.35)                             | 146 (82.02)                                       | 32 (17.98)                                    |
| 0010001                                          | 5 (0.01)                               | 1 (20)                                            | 4 (80)                                        |
| 0010010                                          | 5 (0.01)                               | 3 (60)                                            | 2 (40)                                        |
| 0010100                                          | 32 (0.06)                              | 20 (62.5)                                         | 12 (37.5)                                     |
| 0010101                                          | 3 (0.01)                               | 2 (66.67)                                         | 1 (33.33)                                     |
| 0010110                                          | 4 (0.01)                               | 1 (25)                                            | 3 (75)                                        |
| 0010111                                          | 1 (0)                                  | 1 (100)                                           | 0 (0)                                         |
| 0011000                                          | 19 (0.04)                              | 17 (89.47)                                        | 2 (10.53)                                     |
| 0011010                                          | 4 (0.01)                               | 3 (75)                                            | 1 (25)                                        |
| 0011100                                          | 5 (0.01)                               | 1 (20)                                            | 4 (80)                                        |
| 0011110                                          | 2 (0)                                  | 0 (0)                                             | 2 (100)                                       |
| 0100000                                          | 9,485 (18.56)                          | 8,336 (87.89)                                     | 1,149 (12.11)                                 |
| 0100001                                          | 165 (0.32)                             | 149 (90.3)                                        | 16 (9.7)                                      |
| 0100010                                          | 393 (0.77)                             | 313 (79.64)                                       | 80 (20.36)                                    |
| 0100011                                          | 11 (0.02)                              | 9 (81.82)                                         | 2 (18.18)                                     |
| 0100100                                          | 1,571 (3.07)                           | 1,140 (72.57)                                     | 431 (27.43)                                   |
| 0100101                                          | 38 (0.07)                              | 23 (60.53)                                        | 15 (39.47)                                    |
| 0100110                                          | 144 (0.28)                             | 71 (49.31)                                        | 73 (50.69)                                    |
| 0100111                                          | 9 (0.02)                               | 3 (33.33)                                         | 6 (66.67)                                     |
| 0101000                                          | 450 (0.88)                             | 411 (91.33)                                       | 39 (8.67)                                     |
| 0101001                                          | 10 (0.02)                              | 9 (90)                                            | 1 (10)                                        |
| 0101010                                          | 45 (0.09)                              | 35 (77.78)                                        | 10 (22.22)                                    |
| 0101100                                          | 127 (0.25)                             | 95 (74.8)                                         | 32 (25.2)                                     |
| 0101101                                          | 4 (0.01)                               | 3 (75)                                            | 1 (25)                                        |
| 0101110                                          | 19 (0.04)                              | 11 (57.89)                                        | 8 (42.11)                                     |

|         |               |               |             |
|---------|---------------|---------------|-------------|
| 0110000 | 556 (1.09)    | 441 (79.32)   | 115 (20.68) |
| 0110001 | 21 (0.04)     | 15 (71.43)    | 6 (28.57)   |
| 0110010 | 52 (0.1)      | 30 (57.69)    | 22 (42.31)  |
| 0110011 | 5 (0.01)      | 0 (0)         | 5 (100)     |
| 0110100 | 189 (0.37)    | 108 (57.14)   | 81 (42.86)  |
| 0110101 | 12 (0.02)     | 8 (66.67)     | 4 (33.33)   |
| 0110110 | 25 (0.05)     | 12 (48)       | 13 (52)     |
| 0110111 | 3 (0.01)      | 1 (33.33)     | 2 (66.67)   |
| 0111000 | 52 (0.1)      | 46 (88.46)    | 6 (11.54)   |
| 0111001 | 2 (0)         | 2 (100)       | 0 (0)       |
| 0111010 | 12 (0.02)     | 7 (58.33)     | 5 (41.67)   |
| 0111011 | 1 (0)         | 1 (100)       | 0 (0)       |
| 0111100 | 27 (0.05)     | 18 (66.67)    | 9 (33.33)   |
| 0111101 | 1 (0)         | 0 (0)         | 1 (100)     |
| 0111110 | 4 (0.01)      | 2 (50)        | 2 (50)      |
| 1000000 | 1,725 (3.38)  | 1,595 (92.46) | 130 (7.54)  |
| 1000001 | 5 (0.01)      | 4 (80)        | 1 (20)      |
| 1000010 | 165 (0.32)    | 133 (80.61)   | 32 (19.39)  |
| 1000011 | 1 (0)         | 1 (100)       | 0 (0)       |
| 1000100 | 241 (0.47)    | 205 (85.06)   | 36 (14.94)  |
| 1000101 | 3 (0.01)      | 1 (33.33)     | 2 (66.67)   |
| 1000110 | 26 (0.05)     | 15 (57.69)    | 11 (42.31)  |
| 1000111 | 1 (0)         | 0 (0)         | 1 (100)     |
| 1001000 | 504 (0.99)    | 483 (95.83)   | 21 (4.17)   |
| 1001001 | 3 (0.01)      | 3 (100)       | 0 (0)       |
| 1001010 | 59 (0.12)     | 51 (86.44)    | 8 (13.56)   |
| 1001100 | 58 (0.11)     | 46 (79.31)    | 12 (20.69)  |
| 1001110 | 12 (0.02)     | 8 (66.67)     | 4 (33.33)   |
| 1010000 | 100 (0.2)     | 81 (81)       | 19 (19)     |
| 1010001 | 6 (0.01)      | 5 (83.33)     | 1 (16.67)   |
| 1010010 | 39 (0.08)     | 28 (71.79)    | 11 (28.21)  |
| 1010011 | 2 (0)         | 2 (100)       | 0 (0)       |
| 1010100 | 21 (0.04)     | 16 (76.19)    | 5 (23.81)   |
| 1010110 | 14 (0.03)     | 9 (64.29)     | 5 (35.71)   |
| 1010111 | 1 (0)         | 1 (100)       | 0 (0)       |
| 1011000 | 64 (0.13)     | 60 (93.75)    | 4 (6.25)    |
| 1011001 | 2 (0)         | 1 (50)        | 1 (50)      |
| 1011010 | 24 (0.05)     | 16 (66.67)    | 8 (33.33)   |
| 1011011 | 2 (0)         | 2 (100)       | 0 (0)       |
| 1011100 | 12 (0.02)     | 10 (83.33)    | 2 (16.67)   |
| 1011110 | 4 (0.01)      | 2 (50)        | 2 (50)      |
| 1100000 | 8,063 (15.78) | 7,065 (87.62) | 998 (12.38) |
| 1100001 | 211 (0.41)    | 176 (83.41)   | 35 (16.59)  |
| 1100010 | 577 (1.13)    | 472 (81.8)    | 105 (18.2)  |
| 1100011 | 17 (0.03)     | 13 (76.47)    | 4 (23.53)   |
| 1100100 | 1,779 (3.48)  | 1,306 (73.41) | 473 (26.59) |

|         |              |               |             |
|---------|--------------|---------------|-------------|
| 1100101 | 65 (0.13)    | 48 (73.85)    | 17 (26.15)  |
| 1100110 | 196 (0.38)   | 102 (52.04)   | 94 (47.96)  |
| 1100111 | 6 (0.01)     | 4 (66.67)     | 2 (33.33)   |
| 1101000 | 1,920 (3.76) | 1,738 (90.52) | 182 (9.48)  |
| 1101001 | 51 (0.1)     | 44 (86.27)    | 7 (13.73)   |
| 1101010 | 238 (0.47)   | 190 (79.83)   | 48 (20.17)  |
| 1101011 | 5 (0.01)     | 3 (60)        | 2 (40)      |
| 1101100 | 421 (0.82)   | 311 (73.87)   | 110 (26.13) |
| 1101101 | 17 (0.03)    | 14 (82.35)    | 3 (17.65)   |
| 1101110 | 93 (0.18)    | 60 (64.52)    | 33 (35.48)  |
| 1101111 | 4 (0.01)     | 4 (100)       | 0 (0)       |
| 1110000 | 708 (1.39)   | 562 (79.38)   | 146 (20.62) |
| 1111001 | 21 (0.04)    | 18 (85.71)    | 3 (14.29)   |
| 1111010 | 91 (0.18)    | 70 (76.92)    | 21 (23.08)  |
| 1111011 | 11 (0.02)    | 7 (63.64)     | 4 (36.36)   |
| 1111100 | 108 (0.21)   | 68 (62.96)    | 40 (37.04)  |
| 1111101 | 5 (0.01)     | 3 (60)        | 2 (40)      |
| 1111110 | 51 (0.1)     | 27 (52.94)    | 24 (47.06)  |
| 1111111 | 4 (0.01)     | 3 (75)        | 1 (25)      |

<sup>1</sup>Binary seven-digit value elaboration (left to right): 1<sup>st</sup> digit = Other CT scans excluding outcome resource; 2<sup>nd</sup> digit = X-rays; 3<sup>rd</sup> digit = Special imaging techniques; 4<sup>th</sup> digit = MRI & MRA; 5<sup>th</sup> digit = Ultrasound; 6<sup>th</sup> digit = Nuclear Medicine; 7<sup>th</sup> digit = Miscellaneous

**Table S4.** Patient characteristics for the top and bottom five patient-visits where predicted resource usage probabilities and actual resource utilization are not aligned.

|                                                                             |                                         |                              |                               |                              |                              |                            |                               |                               |                               |                         |
|-----------------------------------------------------------------------------|-----------------------------------------|------------------------------|-------------------------------|------------------------------|------------------------------|----------------------------|-------------------------------|-------------------------------|-------------------------------|-------------------------|
| Patient ID                                                                  | 345                                     | 37368                        | 12962                         | 25049                        | 10468                        | 5412                       | 35121                         | 16911                         | 11910                         | 9292                    |
| <b>Use of CT of Pelvis and Abdomen Without Contrast (Response Resource)</b> |                                         |                              |                               |                              |                              |                            |                               |                               |                               |                         |
| Actual                                                                      | Yes                                     | Yes                          | Yes                           | Yes                          | Yes                          | No                         | No                            | No                            | No                            | No                      |
| Predicted                                                                   | No                                      | No                           | No                            | No                           | No                           | Yes                        | Yes                           | Yes                           | Yes                           | Yes                     |
| Predicted Probability                                                       | 0.0036                                  | 0.0073                       | 0.008                         | 0.0087                       | 0.0094                       | 0.9627                     | 0.9688                        | 0.978                         | 0.9824                        | 0.9933                  |
| <b>Patient Characteristics</b>                                              |                                         |                              |                               |                              |                              |                            |                               |                               |                               |                         |
| Length of Stay                                                              | 2                                       | 3                            | 1                             | 3                            | 1                            | 100                        | 103                           | 134                           | 166                           | 135                     |
| Standard Payor Description                                                  | Managed Care Non-Cap                    | Other                        | Medicaid Managed Care Non-Cap | Commercial Indemnity         | Managed Care Non-Cap         | Self-Pay                   | Medicare Managed Care Non-Cap | Other Government Payers       | Medicare Managed Care Non-Cap | Commercial Indemnity    |
| ICD Class for Prostate Cancer Diagnosis                                     | Principal                               | Principal                    | Principal                     | Principal                    | Principal                    | Secondary                  | Secondary                     | Secondary                     | Secondary                     | Secondary               |
| History of Malignancy                                                       | No                                      | No                           | No                            | No                           | No                           | No                         | No                            | Yes                           | No                            | Yes                     |
| Age Group                                                                   | 46-50                                   | 66-70                        | 56-60                         | 56-60                        | 66-70                        | 61-65                      | 81-85                         | 71-75                         | 71-75                         | 51-55                   |
| Race                                                                        | White                                   | White                        | White                         | White                        | White                        | White                      | Black                         | White                         | White                         | Black                   |
| Point of Origin                                                             | Transfer from Ambulatory Surgery Center | Clinic                       | Clinic                        | Clinic                       | Clinic                       | Non-Healthcare Facility    | Non-Healthcare Facility       | Non-Healthcare Facility       | Non-Healthcare Facility       | Non-Healthcare Facility |
| Primary Reason for Hospital Visit (MS-DRG <sup>1</sup> )                    | Major Male Pelvic Procedures            | Major Male Pelvic Procedures | Major Male Pelvic Procedures  | Major Male Pelvic Procedures | Major Male Pelvic Procedures | Other Kidney Urinary Tract | Other                         | Cardiac Arrhythmia Conduction | Other                         | Other                   |

|                                       |                             |                            |                                        |                             |                            |                            |                                        |                                |                                         |                             |
|---------------------------------------|-----------------------------|----------------------------|----------------------------------------|-----------------------------|----------------------------|----------------------------|----------------------------------------|--------------------------------|-----------------------------------------|-----------------------------|
|                                       |                             |                            |                                        |                             |                            | Diagnosi<br>s              |                                        | n<br>Disorders                 |                                         |                             |
| Discharge<br>Status                   | Home/Self<br>Care           | Home/Sel<br>f Care         | Home/Sel<br>f Care                     | Home/Self<br>Care           | Home/Sel<br>f Care         | Other                      | Expired                                | Transfere<br>d to SNF          | Transfere<br>d to SNF                   | Expired                     |
| Cost Type                             | Procedura<br>l              | Cost to<br>Charge<br>Ratio | Cost to<br>Charge<br>Ratio             | Cost to<br>Charge<br>Ratio  | Procedur<br>al             | Cost to<br>Charge<br>Ratio | Procedur<br>al                         | Procedural                     | Procedura<br>l                          | Procedura<br>l              |
| Length of Stay                        | 2                           | 3                          | 1                                      | 3                           | 1                          | 100                        | 103                                    | 134                            | 166                                     | 135                         |
| Standard<br>Payor<br>Description      | Managed<br>Care Non-<br>Cap | Other                      | Medicaid<br>Managed<br>Care<br>Non-Cap | Commerci<br>al<br>Indemnity | Managed<br>Care<br>Non-Cap | Self-Pay                   | Medicare<br>Managed<br>Care<br>Non-Cap | Other<br>Governme<br>nt Payers | Medicare<br>Managed<br>Care Non-<br>Cap | Commerci<br>al<br>Indemnity |
| ICD Class                             | Principal                   | Principal                  | Principal                              | Principal                   | Principal                  | Secondar<br>y              | Secondar<br>y                          | Secondary                      | Secondary                               | Secondary                   |
|                                       |                             |                            |                                        |                             |                            |                            |                                        |                                |                                         |                             |
| <b>Comorbidities</b>                  |                             |                            |                                        |                             |                            |                            |                                        |                                |                                         |                             |
| Diabetes<br>Uncomplicate<br>d         | No                          | Yes                        | No                                     | No                          | No                         | No                         | No                                     | No                             | No                                      | No                          |
| Other<br>Neurological<br>Disorders    | No                          | No                         | No                                     | No                          | No                         | No                         | Yes                                    | Yes                            | Yes                                     | No                          |
| Congestive<br>Heart Failure           | No                          | No                         | No                                     | No                          | No                         | No                         | Yes                                    | Yes                            | No                                      | No                          |
| Obesity                               | No                          | No                         | No                                     | Yes                         | No                         | No                         | No                                     | No                             | No                                      | No                          |
| Fluid and<br>Electrolyte<br>Disorders | No                          | No                         | No                                     | No                          | No                         | No                         | Yes                                    | Yes                            | No                                      | Yes                         |
| Lymphoma                              | No                          | No                         | No                                     | No                          | No                         | No                         | No                                     | No                             | No                                      | No                          |
| Chronic<br>Pulmonary<br>Disease       | No                          | No                         | No                                     | Yes                         | Yes                        | No                         | Yes                                    | No                             | No                                      | No                          |
| Paralysis                             | No                          | No                         | No                                     | No                          | No                         | No                         | No                                     | No                             | No                                      | No                          |

|                                 |     |     |     |     |     |     |     |     |     |     |
|---------------------------------|-----|-----|-----|-----|-----|-----|-----|-----|-----|-----|
| Cardiac Arrhythmia              | No  | No  | Yes | No  | No  | Yes | Yes | Yes | No  | No  |
| Renal Failure                   | No  | No  | No  | No  | No  | Yes | Yes | Yes | No  | Yes |
| Hypertension Uncomplicated      | No  | Yes | No  |
| Pulmonary Circulation Disorders | No  |
| Coagulopathy                    | No  | No  | Yes | No  |
| Weight Loss                     | No  | No  | No  | No  | No  | No  | Yes | No  | Yes | Yes |
| Liver Disease                   | No  | No  | No  | No  | No  | No  | Yes | No  | No  | No  |
| Metastatic Cancer               | No  | No  | No  | No  | No  | Yes | Yes | No  | No  | No  |
| Diabetes Complicated            | No  | No  | No  | No  | No  | No  | Yes | No  | No  | Yes |
| Peripheral Vascular Disorders   | Yes | No  |
| Depression                      | No  | No  | No  | No  | Yes | No  | No  | No  | No  | Yes |
| Hypertension Complicated        | No  | No  | No  | No  | No  | Yes | Yes | Yes | No  | No  |
| Rheumatoid Arthritis Collagen   | No  |
| Hypothyroidism                  | No  | No  | No  | Yes | No  | No  | No  | No  | No  | No  |
| Deficiency Anemia               | No  | No  | No  | No  | No  | No  | Yes | No  | No  | No  |
| Valvular Disease                | No  |
| Drug Abuse                      | No  |
| Alcohol Abuse                   | No  |

| Imaging Modalities Used With Response Resource |    |     |    |     |    |    |     |     |     |     |
|------------------------------------------------|----|-----|----|-----|----|----|-----|-----|-----|-----|
| CT                                             | No | Yes | No | Yes | No | No | Yes | Yes | Yes | Yes |
| X-ray                                          | No | No  | No | No  | No | No | Yes | Yes | Yes | Yes |
| Special Imaging Techniques                     | No | No  | No | No  | No | No | No  | No  | No  | Yes |
| MRI/MRA                                        | No | Yes | No | No  | No | No | Yes | Yes | No  | No  |
| Ultrasound                                     | No | No  | No | No  | No | No | Yes | Yes | No  | Yes |
| Nuclear Medicine                               | No | No  | No | No  | No | No | No  | Yes | No  | No  |
| Miscellaneous                                  | No | No  | No | No  | No | No | No  | No  | No  | No  |

<sup>1</sup> MS-DRG: Medical Severity-Diagnosis Related Grouping

**Table S5.** Examples of the top and bottom 5 facilities, among those with at least 30 patients, based on the percentage of mis- (left), over- (middle), and under- (right) utilization of resources along with the count of patients in each facility receiving the outcome imaging resource.

| Facility ID                    | Percentage Utilization | Patient Count | Facility ID                     | Percentage Utilization | Patient Count | Facility ID                      | Percentage Utilization | Patient Count |
|--------------------------------|------------------------|---------------|---------------------------------|------------------------|---------------|----------------------------------|------------------------|---------------|
| <b>Lowest Mis-utilization</b>  |                        |               | <b>Lowest Over-utilization</b>  |                        |               | <b>Lowest Under-utilization</b>  |                        |               |
| 321                            | 0                      | 32            | 37                              | 0                      | 32            | 321                              | 0                      | 32            |
| 456                            | 0                      | 49            | 45                              | 0                      | 35            | 456                              | 0                      | 49            |
| 466                            | 0                      | 55            | 87                              | 0                      | 42            | 466                              | 0                      | 55            |
| 1022                           | 0                      | 45            | 93                              | 0                      | 54            | 949                              | 0                      | 50            |
| 1063                           | 0                      | 36            | 111                             | 0                      | 36            | 1022                             | 0                      | 45            |
| <b>Highest Mis-utilization</b> |                        |               | <b>Highest Over-utilization</b> |                        |               | <b>Highest Under-utilization</b> |                        |               |
| 783                            | 41.86                  | 43            | 706                             | 20.51                  | 39            | 329                              | 32.26                  | 31            |
| 718                            | 42.86                  | 49            | 628                             | 22.50                  | 40            | 962                              | 33.87                  | 62            |
| 1183                           | 45.00                  | 40            | 1106                            | 23.33                  | 30            | 650                              | 37.23                  | 94            |
| 962                            | 45.16                  | 62            | 680                             | 26.47                  | 34            | 782                              | 38.46                  | 39            |
| 1221                           | 46.67                  | 30            | 1221                            | 30                     | 30            | 718                              | 42.86                  | 49            |

**Table S6.** Logistic regression results for the association between misutilization by patient-visit (binary) and ICD class.

|                          | Coef    | SE     | p       |
|--------------------------|---------|--------|---------|
| (Intercept) <sup>1</sup> | -2.7267 | 0.0342 | <0.0001 |
| Secondary ICD Class      | 1.4677  | 0.0365 | <0.0001 |

<sup>1</sup>Reference category: Principal ICD code of C61

**Table S7.** Odds ratios, corresponding 95% CIs, and p-values for the association between misutilization and ICD class.

|                     | OR     | 95% CI        | p       |
|---------------------|--------|---------------|---------|
| Secondary ICD Class | 4.3391 | 4.0419–4.6634 | <0.0001 |

**Table S8.** Logistic regression results for the association between misutilization and age groups.

|                          | Coef    | SE     | p       |
|--------------------------|---------|--------|---------|
| (Intercept) <sup>1</sup> | -2.1335 | 0.2493 | <0.0001 |
| 46-50                    | -0.6127 | 0.3028 | 0.0430  |
| 51-55                    | -0.4331 | 0.2641 | 0.1011  |
| 56-60                    | -0.2102 | 0.2549 | 0.4096  |
| 61-65                    | 0.0109  | 0.2523 | 0.9654  |
| 66-70                    | 0.4083  | 0.2512 | 0.1040  |
| 71-75                    | 0.5758  | 0.2510 | 0.0218  |
| 76-80                    | 0.8485  | 0.2509 | 0.0007  |
| 81-85                    | 0.9762  | 0.2511 | <0.0001 |

<sup>1</sup>Reference category: Ages 45 and under



**Table S9.** Odds ratios, corresponding 95% CIs, and p-values for the association between misutilization and age groups.

|       | OR     | 95% CI        | p       |
|-------|--------|---------------|---------|
| 46-50 | 0.5419 | 0.3031-1.0004 | 0.0430  |
| 51-55 | 0.6485 | 0.3961-1.1222 | 0.1011  |
| 56-60 | 0.8104 | 0.5053-1.3805 | 0.4096  |
| 61-65 | 1.0110 | 0.6341-1.7145 | 0.9654  |
| 66-70 | 1.5043 | 0.9457-2.5462 | 0.1040  |
| 71-75 | 1.7785 | 1.1186-3.0094 | 0.0218  |
| 76-80 | 2.3362 | 1.4696-3.9524 | 0.0007  |
| 81-85 | 2.6543 | 1.6691-4.4920 | <0.0001 |

**Table S10.** Logistic regression results for the associations between over- and under-utilization with payor type.

|                                     | Under-Utilization |        |         | Over-Utilization |        |         |
|-------------------------------------|-------------------|--------|---------|------------------|--------|---------|
|                                     | Coef              | SE     | p       | Coef             | SE     | p       |
| (Intercept) <sup>1</sup>            | -1.7126           | 0.0187 | <0.0001 | -2.6699          | 0.0273 | <0.0001 |
| Charity or Indigent                 | 0.2171            | 0.3074 | 0.4801  | 0.0897           | 0.4646 | 0.8470  |
| Commercial Indemnity                | -1.3405           | 0.0945 | <0.0001 | -0.5905          | 0.1055 | <0.0001 |
| Direct Employer Contract            | -1.7214           | 0.5869 | 0.0034  | -0.2315          | 0.4601 | 0.6149  |
| Managed Care Capitated              | -1.4229           | 0.3865 | 0.0002  | -0.6259          | 0.4166 | 0.1330  |
| Managed Care Non Capitated          | -1.5928           | 0.0625 | <0.0001 | -0.8475          | 0.0714 | <0.0001 |
| Medicaid Managed Care Capitated     | -0.3797           | 0.1977 | 0.0548  | -0.2125          | 0.2760 | 0.4413  |
| Medicaid Managed Care Non Capitated | -0.6935           | 0.1061 | <0.0001 | -0.3549          | 0.1395 | 0.0110  |
| Medicaid Traditional                | 0.0485            | 0.1038 | 0.6403  | -0.1312          | 0.1632 | 0.4212  |
| Medicare Managed Care Capitated     | -0.3935           | 0.0584 | <0.0001 | -0.2000          | 0.0812 | 0.0137  |
| Medicare Managed Care Non Capitated | 0.0251            | 0.0338 | 0.4566  | -0.0595          | 0.0506 | 0.2389  |
| Other                               | -1.6997           | 0.1965 | <0.0001 | -0.5993          | 0.1850 | 0.0012  |
| Other Government Payers             | -0.4110           | 0.0936 | <0.0001 | -0.1970          | 0.1285 | 0.1254  |
| Self-Pay                            | 0.0332            | 0.1325 | 0.8022  | -0.4824          | 0.2422 | 0.0464  |
| Workers Compensation                | -1.2831           | 0.5919 | 0.0302  | -0.0213          | 0.5174 | 0.9671  |

<sup>1</sup> Reference category: Medicare Traditional

**Table S11.** Odds ratios, corresponding 95% CIs, and p-values for the associations between over- and under-utilization with payor type.

|                            | Under-Utilization |               |         | Over-Utilization |               |         |
|----------------------------|-------------------|---------------|---------|------------------|---------------|---------|
|                            | OR                | 95% CI        | p       | OR               | 95% CI        | p       |
| Charity or Indigent        | 1.2425            | 0.6511-2.1954 | 0.4801  | 1.0938           | 0.3825-2.4589 | 0.8470  |
| Commercial Indemnity       | 0.2617            | 0.2164-0.3135 | <0.0001 | 0.5540           | 0.4479-0.6776 | <0.0001 |
| Direct Employer Contract   | 0.1788            | 0.0439-0.4760 | 0.0034  | 0.7933           | 0.2792-1.7627 | 0.6149  |
| Managed Care Capitated     | 0.2410            | 0.1022-0.4761 | 0.0002  | 0.5348           | 0.2099-1.1066 | 0.1330  |
| Managed Care Non Capitated | 0.2034            | 0.1795-0.2295 | <0.0001 | 0.4285           | 0.3717-0.4918 | <0.0001 |



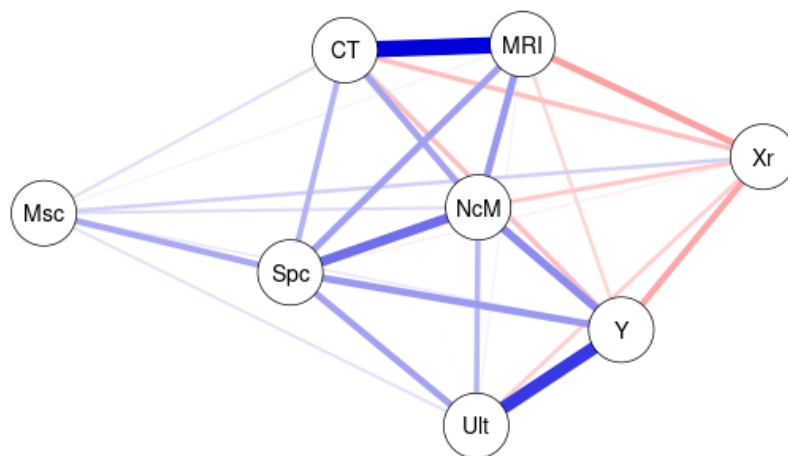

**Figure S2.** Network analysis for associations (using tetrachoric correlations) of resources for patient-visits with the utilization of at least one competing resource.

Y=Response Resource (CT scan of pelvis/abdomen without contrast); Xr=X-rays; Ult=Ultrasound; Spc=Special Imaging Techniques; NcM=Nuclear Medicine; CT=CT scan; MRI=MRI & MRA; Msc=Miscellaneous

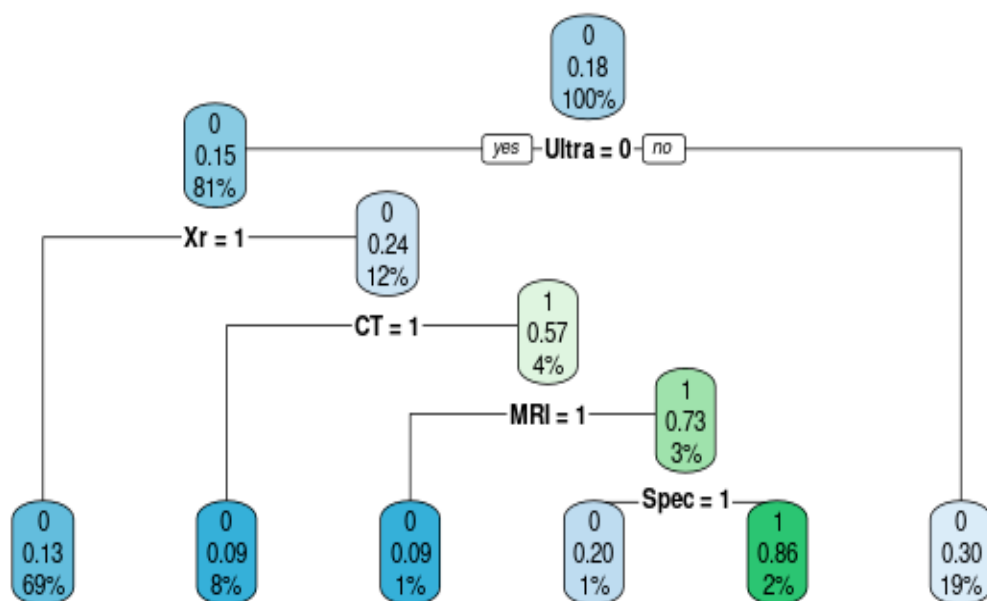

**Figure S3.** Decision tree analysis to isolate different patterns in resource utilization by demonstrating the value of information of competing resources with the response resource.
